# Supplementary material for: Location-dependent maintenance of intrinsic susceptibility to mTORC1-driven tumorigenesis
Source: PubMed Central journal article supplement (PMC6435042; doi:10.26508/lsa.201800218), 2019-03-25
Supplement: LSA-2018-00218_review_history.pdf [file LSA-2018-00218_review_history.pdf]

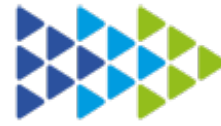

Life Science Alliance

# Location-dependent maintenance of an intrinsic susceptibility to mTORC1-driven tumorigenesis

Gabrielle Rushing, Asa Brockman, Madelyn Bollig, Nalin Leelatian, Bret Mobley, Jonathan Irish, Kevin Ess, Cary Fu, and Rebecca Ihrie

DOI: <https://doi.org/10.26508/lsa.201800218>

*Corresponding author(s): Rebecca Ihrie, Vanderbilt University*

---

|                         |                     |            |
|-------------------------|---------------------|------------|
| <b>Review Timeline:</b> | Submission Date:    | 2018-10-19 |
|                         | Editorial Decision: | 2018-10-22 |
|                         | Revision Received:  | 2019-02-25 |
|                         | Editorial Decision: | 2019-02-26 |
|                         | Revision Received:  | 2019-03-06 |
|                         | Accepted:           | 2019-03-07 |

---

*Scientific Editor: Andrea Leibfried*

## Transaction Report:

(Note: With the exception of the correction of typographical or spelling errors that could be a source of ambiguity, letters and reports are not edited. The original formatting of letters and referee reports may not be reflected in this compilation.)

Please note that the manuscript was previously reviewed at another journal and the reports were taken into account in the decision-making process at Life Science Alliance. Since the original reviews are not subject to Life Science Alliance's transparent review process policy, the reports and author response cannot be published.

October 22, 2018

Re: Life Science Alliance manuscript #LSA-2018-00218-T

Dr. Rebecca Ihrie  
Vanderbilt University Medical Center  
Nashville, TN 37232

Dear Dr. Ihrie,

Thank you for transferring your manuscript entitled "Location-dependent maintenance of an intrinsic susceptibility to mTORC1-driven tumorigenesis" to Life Science Alliance. The manuscript was assessed by expert reviewers at another journal before, and the editors transferred those reports to us with your permission.

The reviewers pointed out that your conclusion on altered mTORC signaling strength in different NSPC populations would need further support with additional assays. They further noted that the TSC2 knock-out experiment requires a control, and that the effects observed in vivo could be confounded by the epilepsy mice develop. The reviewers also suggested to support the observed effects by performing in vitro proliferation assays. We think that these concerns can be addressed in a point-by-point response and text changes and by revising your work, and we would be happy to publish such a revised version in Life Science Alliance. We would thus like to invite you to revise your work, including an additional assay for mTORC signaling strength and the requested control, and - if feasible - an in vitro proliferation assay upon TSC2 knock-down. Please note that the request for neurosphere assays is not required for publication here.

To upload the revised version of your manuscript, please log in to your account:

<https://lsa.msubmit.net/cgi-bin/main.plex>

You will be guided to complete the submission of your revised manuscript and to fill in all necessary information.

We would be happy to discuss the individual revision points further with you should this be helpful.

While you are revising your manuscript, please also attend to the below editorial points to help expedite the publication of your manuscript. Please direct any editorial questions to the journal office.

The typical timeframe for revisions is three months. Please note that papers are generally considered through only one revision cycle, so strong support from the referees on the revised version is needed for acceptance.

When submitting the revision, please include a letter addressing the reviewers' comments point by point.

Thank you for this interesting contribution to Life Science Alliance. We are looking forward to receiving your revised manuscript.

Sincerely,

Andrea Leibfried, PhD  
Executive Editor  
Life Science Alliance  
Meyerhofstr. 1  
69117 Heidelberg, Germany  
t +49 6221 8891 502  
e a.leibfried@life-science-alliance.org  
www.life-science-alliance.org

---

#### A. THESE ITEMS ARE REQUIRED FOR REVISIONS

- A letter addressing the reviewers' comments point by point.
- An editable version of the final text (.DOC or .DOCX) is needed for copyediting (no PDFs).
- High-resolution figure, supplementary figure and video files uploaded as individual files: See our detailed guidelines for preparing your production-ready images, <http://life-science-alliance.org/authorguide>
- Summary blurb (enter in submission system): A short text summarizing in a single sentence the study (max. 200 characters including spaces). This text is used in conjunction with the titles of papers, hence should be informative and complementary to the title and running title. It should describe the context and significance of the findings for a general readership; it should be written in the present tense and refer to the work in the third person. Author names should not be mentioned.

#### B. MANUSCRIPT ORGANIZATION AND FORMATTING:

Full guidelines are available on our Instructions for Authors page, <http://life-science-alliance.org/authorguide>

We encourage our authors to provide original source data, particularly uncropped/-processed electrophoretic blots and spreadsheets for the main figures of the manuscript. If you would like to add source data, we would welcome one PDF/Excel-file per figure for this information. These files will be linked online as supplementary "Source Data" files.

**\*\*\*IMPORTANT:** It is Life Science Alliance policy that if requested, original data images must be made available. Failure to provide original images upon request will result in unavoidable delays in publication. Please ensure that you have access to all original microscopy and blot data images before submitting your revision.**\*\*\***

---

February 26, 2019

RE: Life Science Alliance Manuscript #LSA-2018-00218-TR

Dr. Rebecca Ihrie  
Vanderbilt University  
Cell and Developmental Biology  
2220 Pierce Ave  
761 PRB  
Nashville, TN 37232-6840

Dear Dr. Ihrie,

Thank you for submitting your revised manuscript entitled "Location-dependent maintenance of an intrinsic susceptibility to mTORC1-driven tumorigenesis". We appreciate your point-by-point response and the introduced changes and we would thus be happy to publish your paper in Life Science Alliance pending final revisions necessary to meet our formatting guidelines:

- please provide the manuscript file as a word docx file
- please upload individual files for each figure (also for S figures)
- please include a statement that informed consent was obtained from all human subjects/their legal representatives and that the experiments conformed to the principles set out in the WMA Declaration of Helsinki and the Department of Health and Human Services Belmont Report
- please add callouts in the manuscript text for figure 4H, S2A, Table S1
- please note that some figure callouts are missing 'Fig' or 'Figure' (eg, "(S3A)" on page 5)
- please note that on p32, "(see antibody table)" needs to be more specific: "table S1"
- please note that Figure panel 4H is currently mis-spelled as '4G' in the figure
- I would like to suggest to include the methods and references of the supplemental information in the main manuscript

If you are planning a press release on your work, please inform us immediately to allow informing our production team and scheduling a release date.

To upload the final version of your manuscript, please log in to your account:

<https://lsa.msubmit.net/cgi-bin/main.plex>

You will be guided to complete the submission of your revised manuscript and to fill in all necessary information.

To avoid unnecessary delays in the acceptance and publication of your paper, please read the following information carefully.

#### A. FINAL FILES:

These items are required for acceptance.

-- An editable version of the final text (.DOC or .DOCX) is needed for copyediting (no PDFs).

-- High-resolution figure, supplementary figure and video files uploaded as individual files: See our detailed guidelines for preparing your production-ready images, <http://www.life-science-alliance.org/authors>

-- Summary blurb (enter in submission system): A short text summarizing in a single sentence the study (max. 200 characters including spaces). This text is used in conjunction with the titles of papers, hence should be informative and complementary to the title. It should describe the context and significance of the findings for a general readership; it should be written in the present tense and refer to the work in the third person. Author names should not be mentioned.

## B. MANUSCRIPT ORGANIZATION AND FORMATTING:

Full guidelines are available on our Instructions for Authors page, <http://www.life-science-alliance.org/authors>

We encourage our authors to provide original source data, particularly uncropped/-processed electrophoretic blots and spreadsheets for the main figures of the manuscript. If you would like to add source data, we would welcome one PDF/Excel-file per figure for this information. These files will be linked online as supplementary "Source Data" files.

**\*\*Submission of a paper that does not conform to Life Science Alliance guidelines will delay the acceptance of your manuscript.\*\***

**\*\*It is Life Science Alliance policy that if requested, original data images must be made available to the editors. Failure to provide original images upon request will result in unavoidable delays in publication. Please ensure that you have access to all original data images prior to final submission.\*\***

**\*\*The license to publish form must be signed before your manuscript can be sent to production. A link to the electronic license to publish form will be sent to the corresponding author only. Please take a moment to check your funder requirements.\*\***

**\*\*Reviews, decision letters, and point-by-point responses associated with peer-review at Life Science Alliance will be published online, alongside the manuscript. If you do want to opt out of this transparent process, please let us know immediately.\*\***

Thank you for your attention to these final processing requirements. Please revise and format the manuscript and upload materials within 7 days.

Thank you for this interesting contribution, we look forward to publishing your paper in Life Science Alliance.

Sincerely,

Andrea Leibfried, PhD  
Executive Editor  
Life Science Alliance  
Meyerhofstr. 1  
69117 Heidelberg, Germany  
t +49 6221 8891 502

e.a.leibfried@life-science-alliance.org  
www.life-science-alliance.org

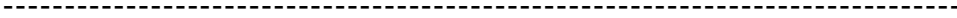

March 7, 2019

RE: Life Science Alliance Manuscript #LSA-2018-00218-TRR

Dr. Rebecca A Ihrie  
Vanderbilt University  
Cell and Developmental Biology  
2220 Pierce Ave  
761 PRB  
Nashville, TN 37232-6840

Dear Dr. Ihrie,

Thank you for submitting your Research Article entitled "Location-dependent maintenance of an intrinsic susceptibility to mTORC1-driven tumorigenesis". It is a pleasure to let you know that your manuscript is now accepted for publication in Life Science Alliance. Congratulations on this interesting work.

The final published version of your manuscript will be deposited by us to PubMed Central upon online publication.

Your manuscript will now progress through copyediting and proofing. It is journal policy that authors provide original data upon request.

Reviews, decision letters, and point-by-point responses associated with peer-review at Life Science Alliance will be published online, alongside the manuscript. If you do want to opt out of this transparent process, please let us know immediately.

**\*\*\*IMPORTANT:** If you will be unreachable at any time, please provide us with the email address of an alternate author. Failure to respond to routine queries may lead to unavoidable delays in publication.\*\*\*

Scheduling details will be available from our production department. You will receive proofs shortly before the publication date. Only essential corrections can be made at the proof stage so if there are any minor final changes you wish to make to the manuscript, please let the journal office know now.

#### DISTRIBUTION OF MATERIALS:

Authors are required to distribute freely any materials used in experiments published in Life Science Alliance. Authors are encouraged to deposit materials used in their studies to the appropriate repositories for distribution to researchers.

You can contact the journal office with any questions, [contact@life-science-alliance.org](mailto:contact@life-science-alliance.org)

Again, congratulations on a very nice paper. I hope you found the review process to be constructive and are pleased with how the manuscript was handled editorially. We look forward to future exciting submissions from your lab.

Sincerely,

Andrea Leibfried, PhD  
Executive Editor  
Life Science Alliance  
Meyerohofstr. 1  
69117 Heidelberg, Germany  
t +49 6221 8891 502  
e [a.leibfried@life-science-alliance.org](mailto:a.leibfried@life-science-alliance.org)  
[www.life-science-alliance.org](http://www.life-science-alliance.org)
